# Supplementary material for: Comparative Proteomic Analysis of Two Contrasting Maize Hybrids’ Responses to Low Nitrogen Stress at the Twelve Leaf Stage and Function Verification of ZmTGA Gene
Source: MDPI journal article supplement (doi:10.3390/genes13040670), 2022-04-11
Supplement: s1 [file s1]

Supplementary Table S8 qRT-PCR and TMT-Seq values of 15 genes

| ID                      | qRT-PCR | TMT-Seq |
|-------------------------|---------|---------|
| Zm00001d014341(XYT_XYC) | 0.38    | 0.39    |
| Zm00001d015366(XYT_XYC) | 0.82    | 0.30    |
| Zm00001d015366(XYT_HNT) | 0.69    | 0.48    |
| Zm00001d047843(XYT_XYC) | 0.18    | 0.30    |
| Zm00001d047843(XYT_HNT) | 0.29    | 0.37    |
| Zm00001d013706(XYT_XYC) | 0.22    | 0.53    |
| Zm00001d045193(XYT_XYC) | 0.77    | 0.71    |
| Zm00001d045193(HNT_HNC) | 0.55    | 0.41    |
| Zm00001d038163(HNT_HNC) | 0.47    | 0.43    |
| Zm00001d041917(XYT_XYC) | -0.45   | -0.42   |
| Zm00001d050965(XYT_XYC) | -0.19   | -0.40   |
| Zm00001d006421(HNT_HNC) | -0.52   | -0.44   |
| Zm00001d031749(HNT_HNC) | -0.55   | -0.36   |
| Zm00001d000035(XYT/XYC) | -0.47   | -0.44   |
| Zm00001d014383(XYT/XYC) | -0.82   | -0.45   |
