# Supplementary material for: Comparative Proteomic Analysis of Two Contrasting Maize Hybrids’ Responses to Low Nitrogen Stress at the Twelve Leaf Stage and Function Verification of ZmTGA Gene
Source: MDPI journal article supplement (doi:10.3390/genes13040670), 2022-04-11
Supplement: s1 [file s1]

| classification                             | element                     | function                                                            | number |
|--------------------------------------------|-----------------------------|---------------------------------------------------------------------|--------|
| core elements                              | TATA-box                    | core promoter element around -30 of transcription start             | 20     |
|                                            | CAAT-box                    | common cis-acting element in promoter and enhancer regions          | 26     |
| Abiotic stress related regulatory elements | TC-rich repeats             | cis-acting element involved in defense and stress responsiveness    | 3      |
|                                            | ARE                         | cis-acting regulatory element essential for the anaerobic induction | 4      |
| Hormone-related regulatory elements        | ABRE、<br>AAGAA-motif        | cis-acting element involved in the abscisic acid responsiveness     | 5      |
|                                            | TGA-element                 | auxin-responsive element                                            | 4      |
|                                            | P-box、<br>TATC-box          | cis-acting element involved in gibberellin-responsiveness           | 4      |
|                                            | CGTCA-motif、<br>TGACG-motif | cis-acting regulatory element involved in the MeJA-responsiveness   | 4      |
|                                            | TCA-element                 | cis-acting element involved in salicylic acid responsiveness        | 3      |
|                                            | ERE                         | ethylene responsive                                                 | 2      |
| Light response-related elements            | AE-box、<br>G-box、           | cis-acting regulatory element involved in light responsiveness      | 15     |

|  |                             |  |  |
|--|-----------------------------|--|--|
|  | I-box、<br>TCT-motif、<br>MRE |  |  |
|--|-----------------------------|--|--|
